# Supplementary figures and images for: Inhibiting IRE1α-endonuclease activity decreases tumor burden in a mouse model for hepatocellular carcinoma
Source: eLife journal article supplement (doi:10.7554/elife.55865), 2020-10-26

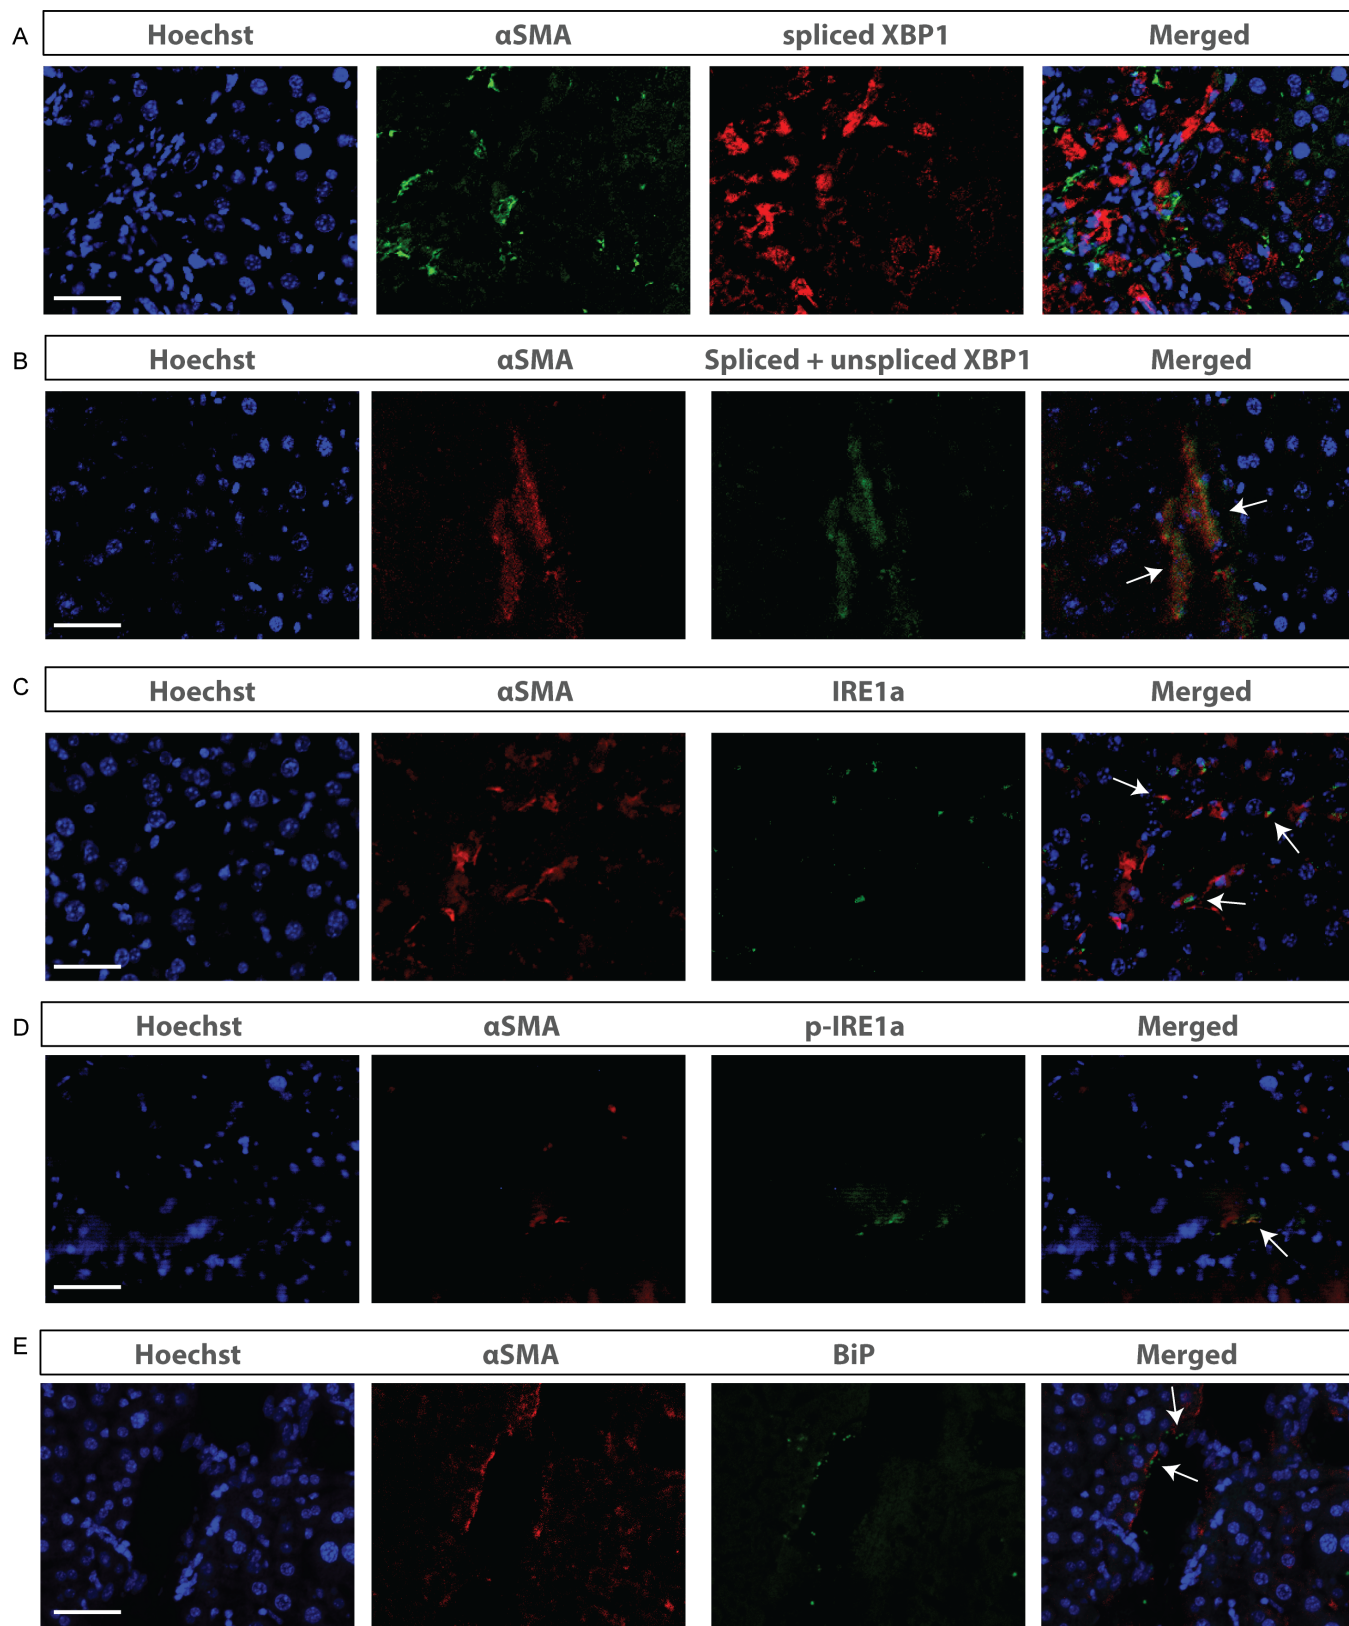

Supplement: supp [file elife-55865-supp-v1.zip]

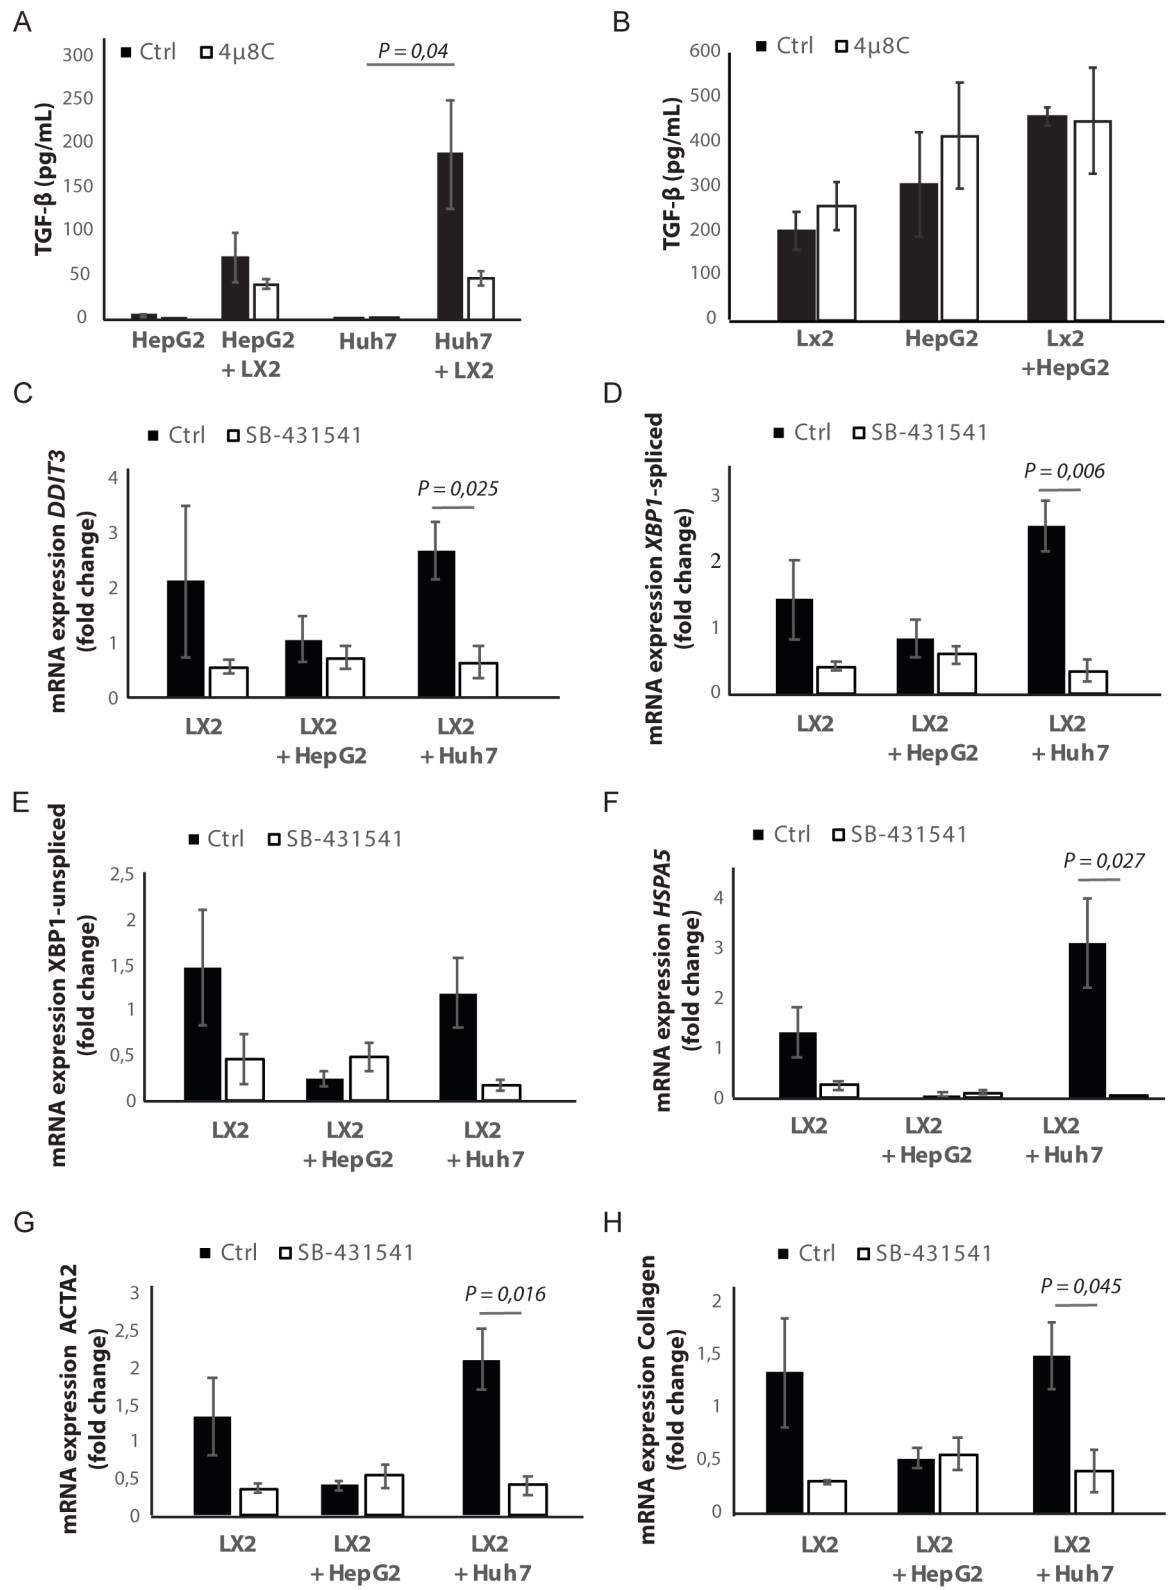

Supplement: supp [file elife-55865-supp-v1.zip]

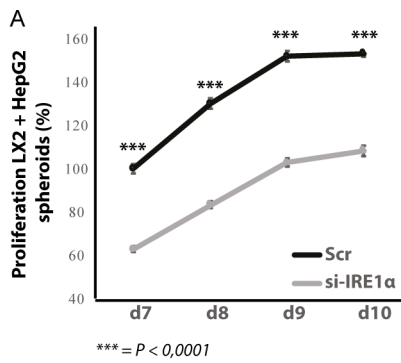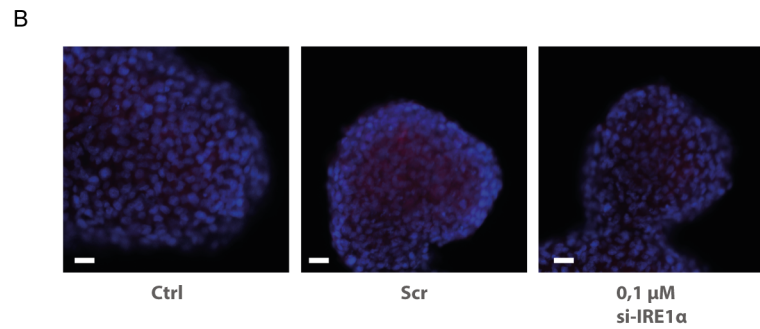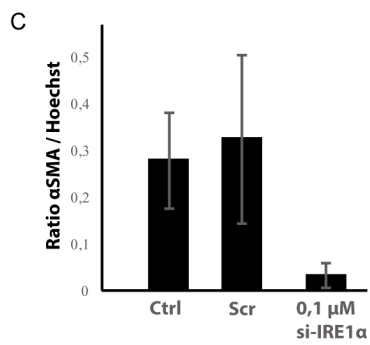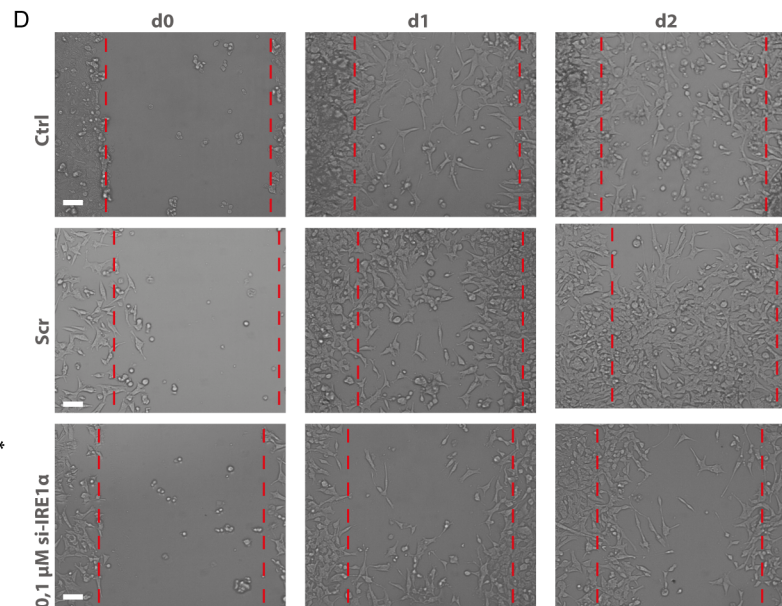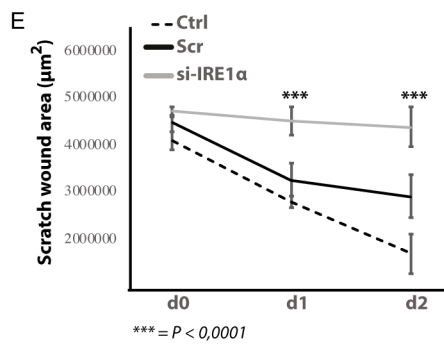

Supplement: supp [file elife-55865-supp-v1.zip]

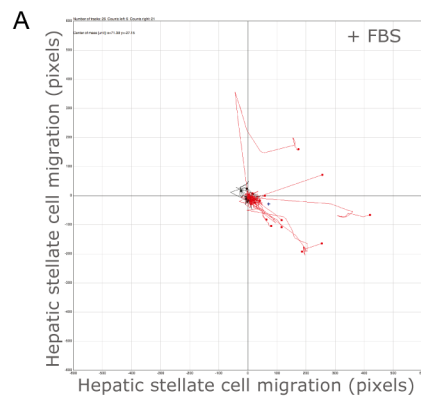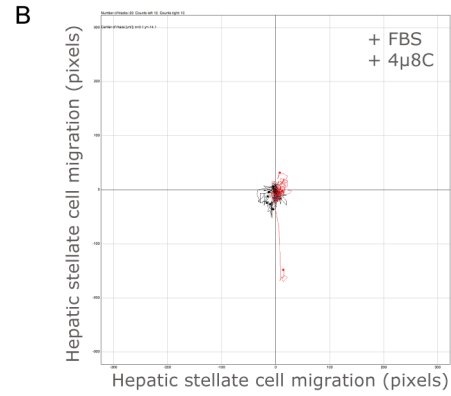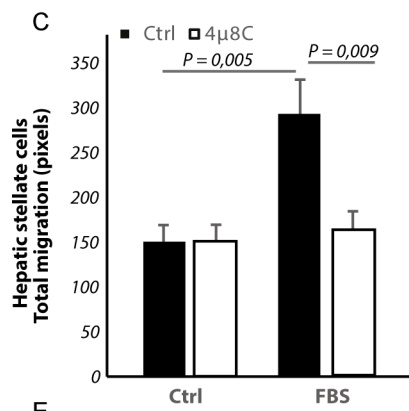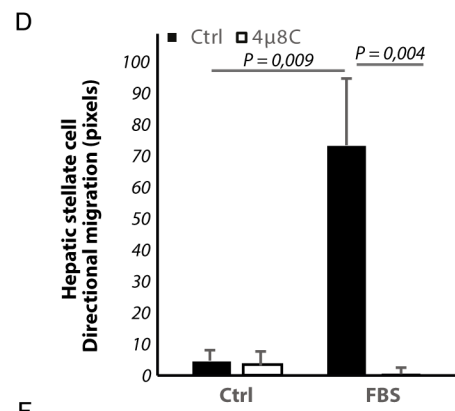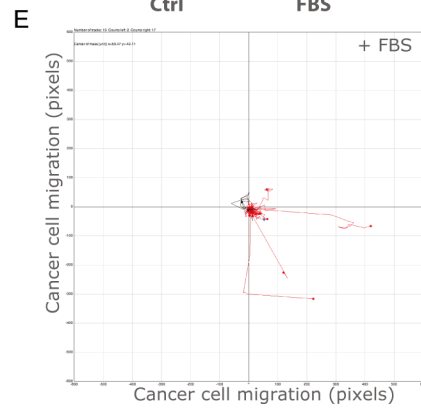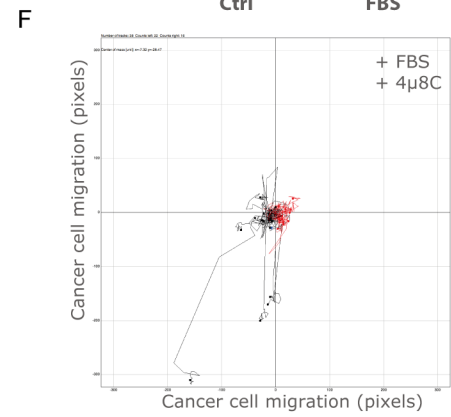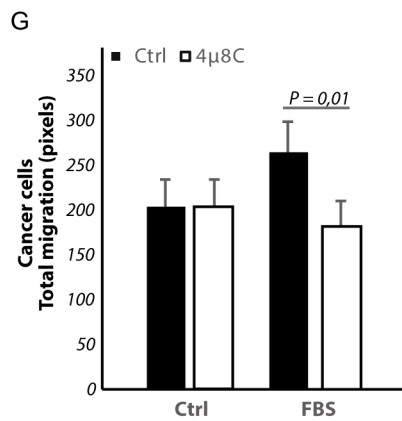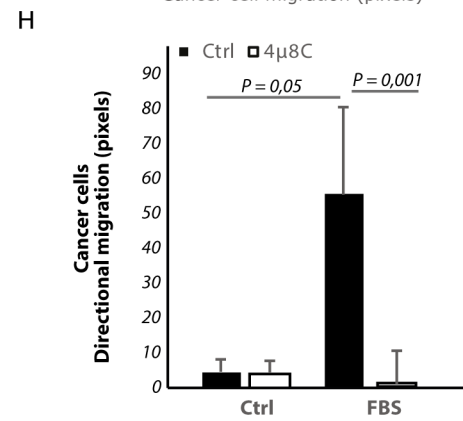

Supplement: supp [file elife-55865-supp-v1.zip]
